# Supplementary material for: Scale-dependent interactions enable emergent microrheological stress response of actin–vimentin composites
Source: Royal Society of Chemistry journal article supplement (doi:10.1039/d4sm00988f), 2024-01-01
Supplement: d4sm00988f1.pdf [file d4sm00988f1.pdf]

Cite this: DOI: 10.1039/xxxxxxxxxx

## Scale-dependent interactions enable emergent microrheological stress response of actin-vimentin composites

Julie Pinchiaroli\*, Renita Saldanha<sup>†</sup>, Alison E Patteson<sup>†</sup>, Rae M. Robertson-Anderson<sup>‡</sup> and Bekele J. Gurmessa\*

\* Department of Physics and Astronomy, Bucknell University, Lewisburg, PA, 17837, USA.

<sup>†</sup> Department of Physics and BioInspired Institute, Syracuse University, Syracuse, NY 13210, USA.

<sup>‡</sup> Department of Physics and Biophysics, University of San Diego, San Diego, CA 92110, USA.

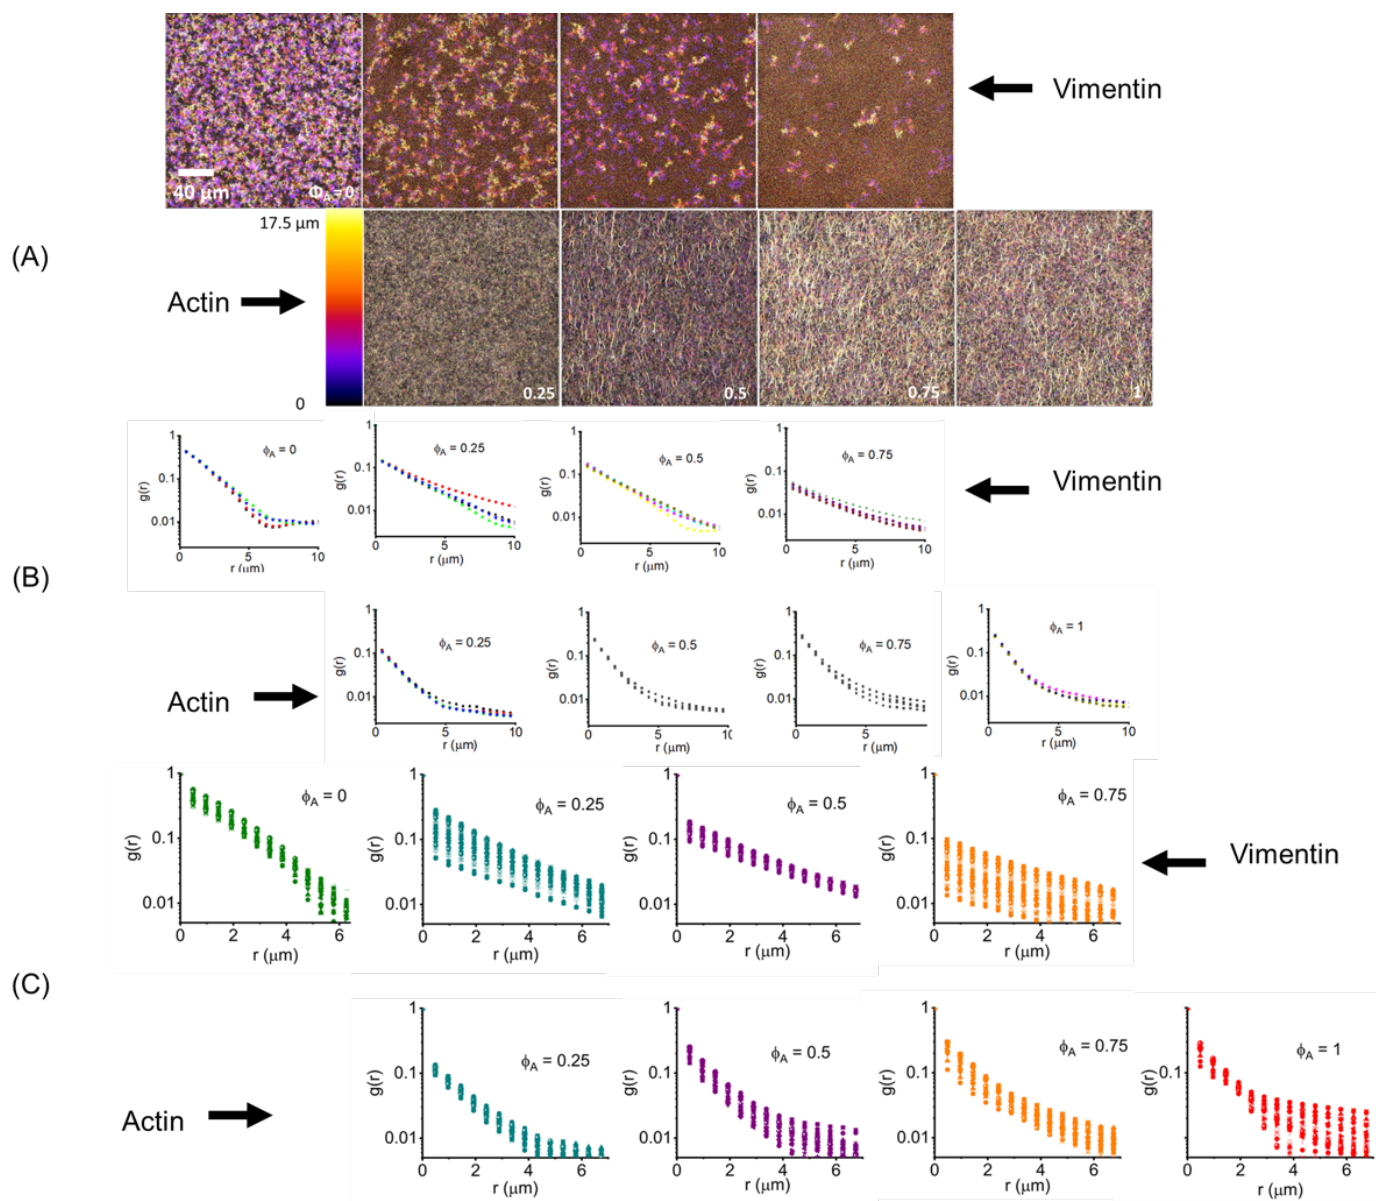

**Fig. 1 S1:** (A) Confocal images of two single channels (vimentin, top row and actin, bottom row) which correspond to each composite image shown in Fig 1 in the main text. The images shown here are temporally color-coded by z-height to illustrate the 3D structure. (B) SIA plots for vimentin (top row) and actin (bottom row) obtained from the greyscale of the single-channel images displayed in (A) after dividing them into quadrants for each channel. The  $g(r)$  for each quadrant was overlaid to show the variation in spatial heterogeneity. (C) SIA ( $g(r)$ ) plots obtained from the full field of view of 3D confocal videos consisting of 35 frames of vimentin (top row) and actin (bottom row). The  $g(r)$  for each composition was displayed to demonstrate the variation between images in z-sectioning.

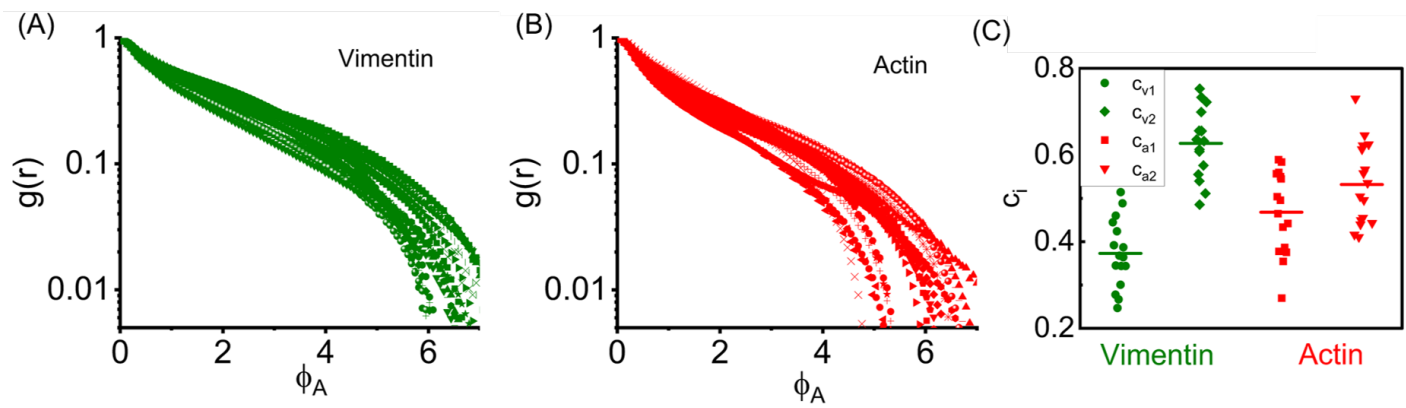

**Fig. 2 S2:** *In vivo* SIA data for individual trials of (A) vimentin, (B) actin, and (C) the relative weighting factor extracted by curve fitting the data in (A) and (B) to a double exponentially decaying function, as described in the main paper.

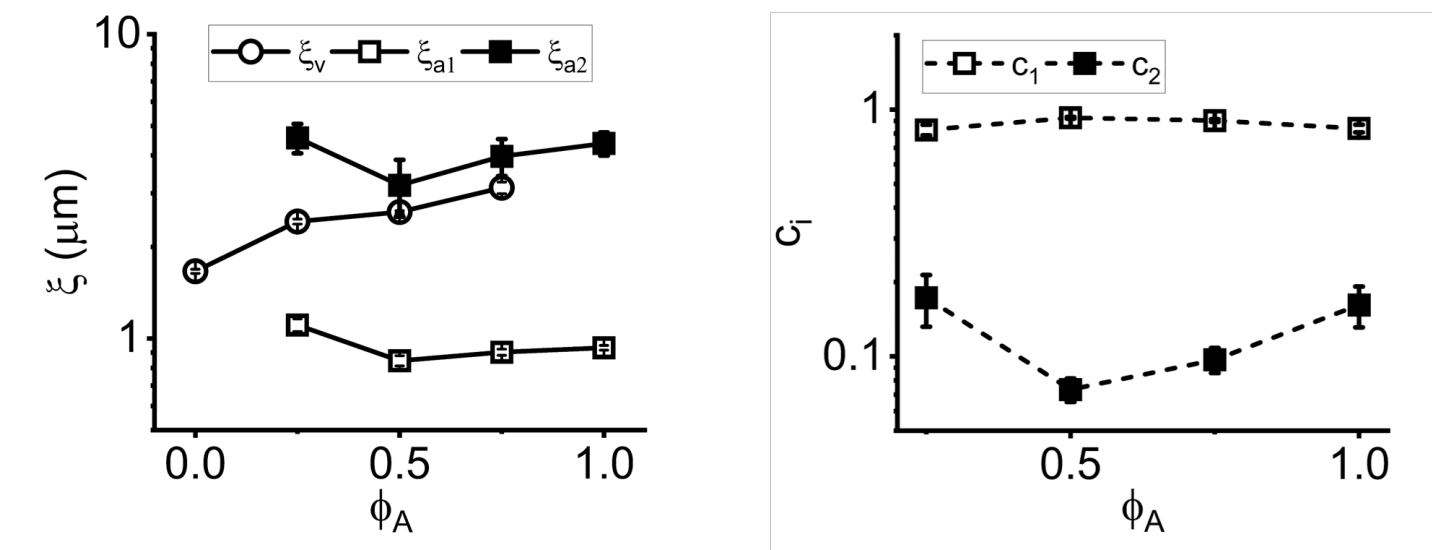

**Fig. 3 S3:** Correlation length (left) and the relative weighting factor (right) of *in vitro* samples whose SIA data is displayed in Fig S1C. They are extracted by curve fitting to a single exponentially decaying function for vimentin and a double exponentially decaying function for actin, as described in the main paper.

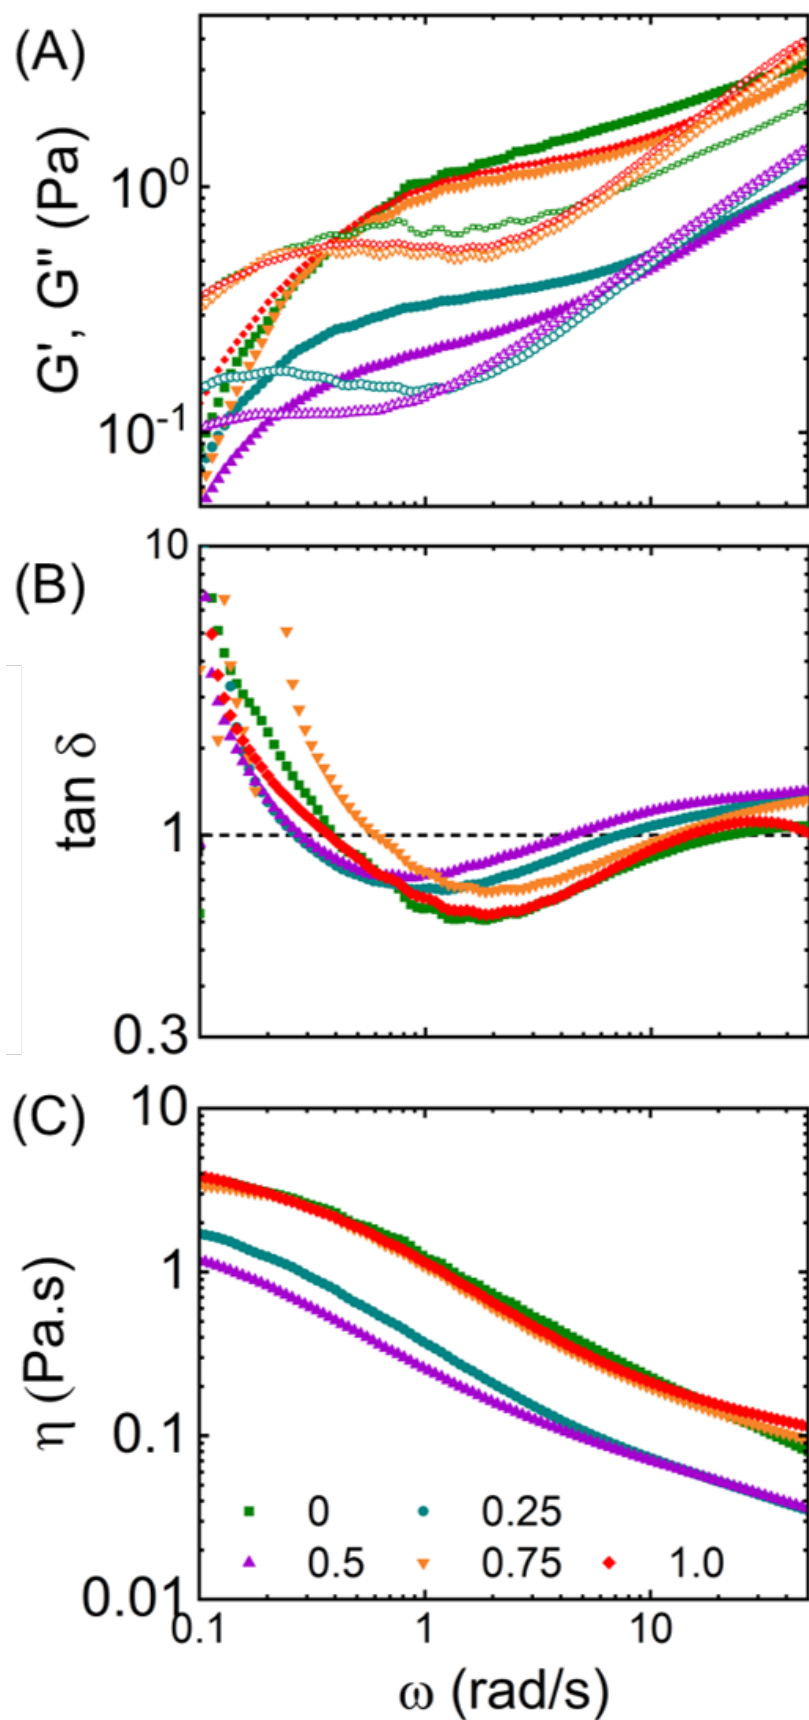

**Fig. 4 S4.** (A) Linear frequency-dependent elastic modulus  $G'$  (closed symbols) and viscous modulus  $G''$  (open symbols) of the actin-vimentin composite networks, (B) Frequency-dependent loss tangent  $\tan \delta = G''(\omega)/G'(\omega)$  versus  $\omega$  computed from data shown in (A) with a dashed black line representing  $G' = G''$ , indicating the extent to which each system exhibits elastic versus viscous dynamics of F-actin-vimentin composite, (C) Frequency-dependent shear viscosity  $\eta(\omega)$ . Each composition is the average of 20 different trials, as explained in the methods section of the main text. *Soft Matter*, [year], [vol.], 1–6

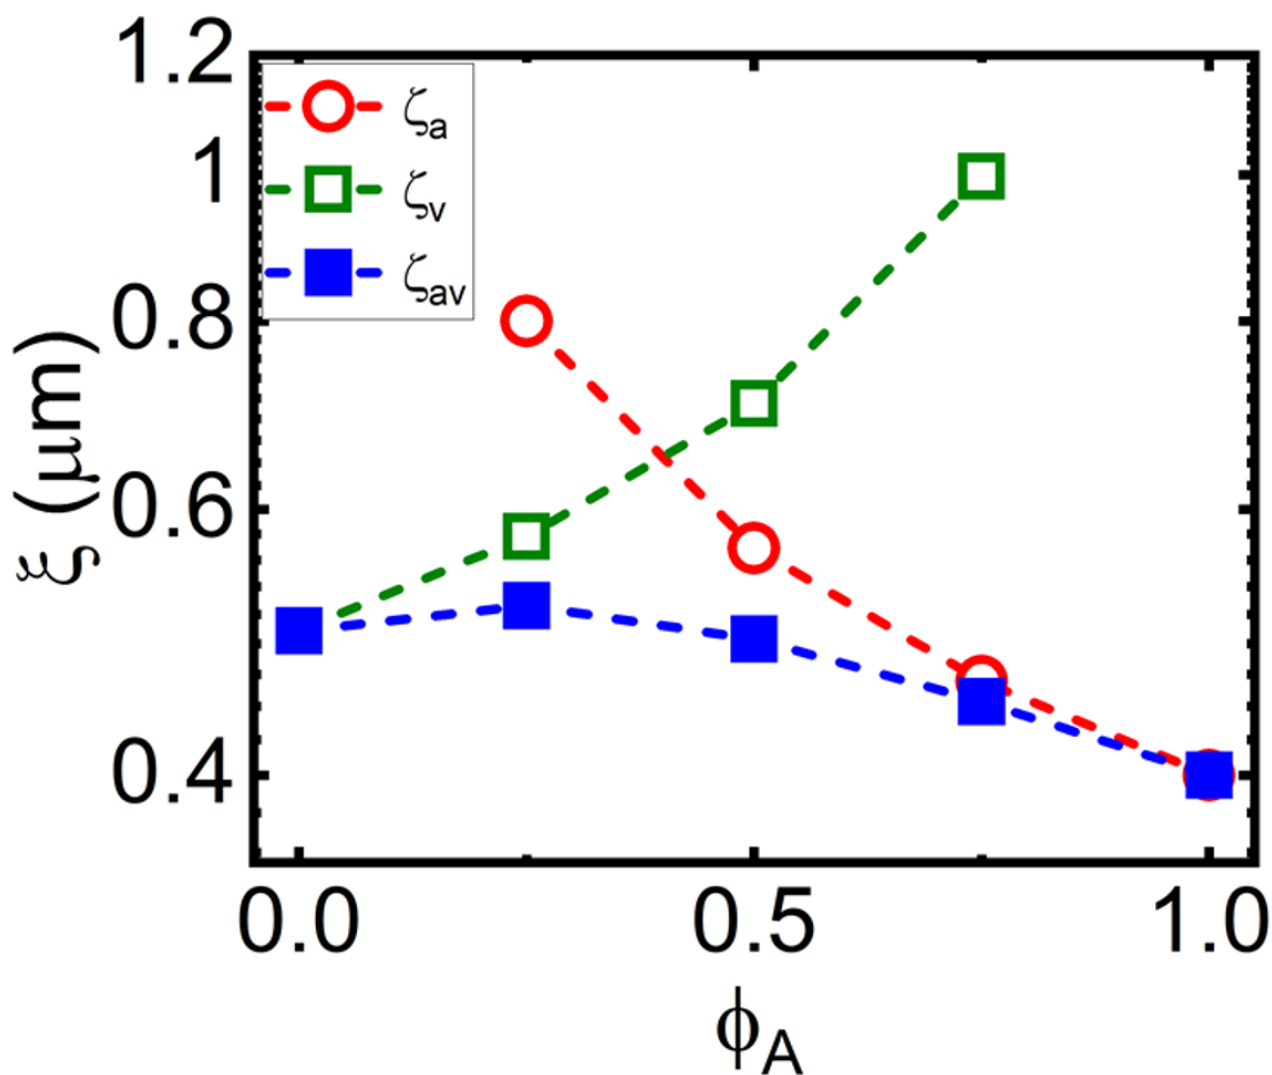

**Fig. 5 S5:** The computed mesh sizes of actin ( $\xi_a$ ), vimentin ( $\xi_v$ ), and the actin-vimentin composite ( $\xi_c$ ) networks, which represent the average distance between adjacent entanglement points, were determined as described in the main text. The mesh size of actin,  $\xi_a$ , decreases as the concentration of actin ( $\phi_A$ ) increases, while the mesh size of vimentin,  $\xi_v$ , increases. However, the overall mesh size of the composite,  $\xi_c$ , remains approximately the same ( $\xi_c = [\xi_a^{-3} + \xi_v^{-3}]^{-1/3} \approx 0.5 \mu\text{m}$ ).

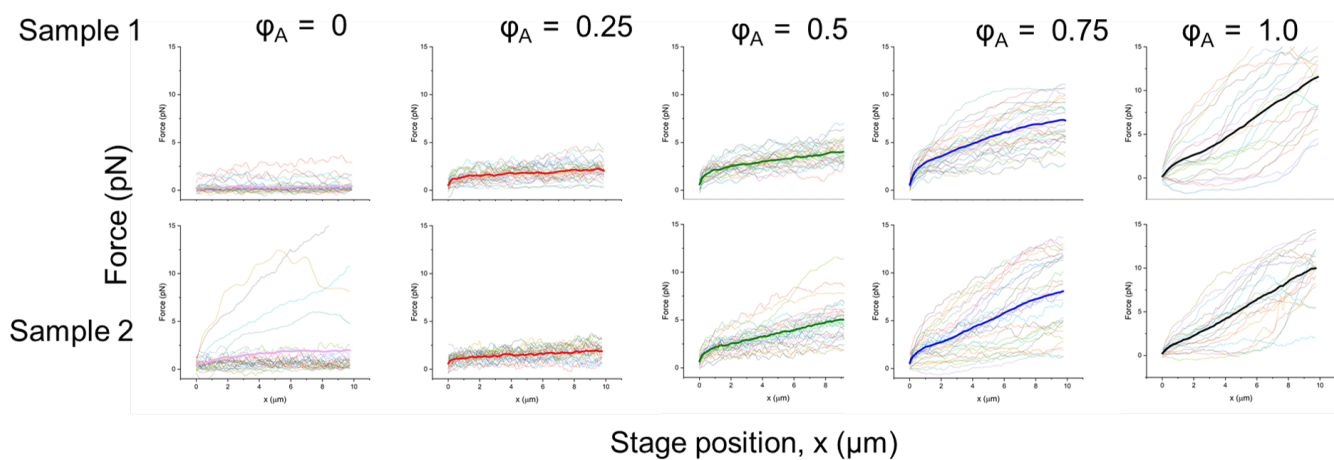

**Fig. 6 S6.** Individual force trials that are averaged over to compute the average force curves  $F(x)$  shown in Fig 4A. Each trial uses a different microsphere probe in a different region of the sample chamber. Each panel corresponds to a different combination of  $\phi_A$  (columns) and the two replicates (rows) as indicated on the top and left of the panel grid.

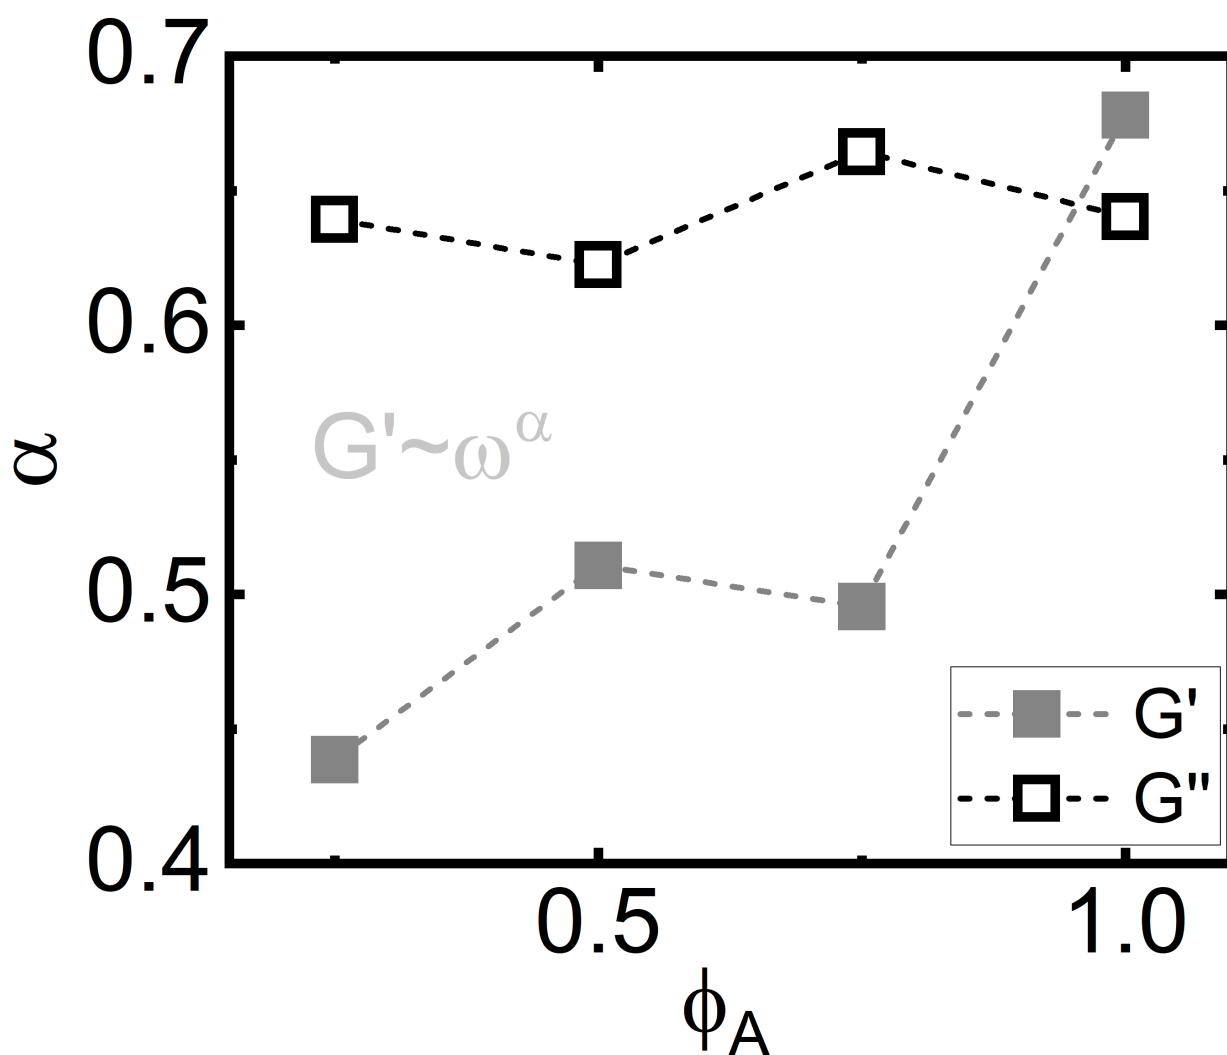

**Fig. 7 S7:** Scaling exponent obtained by fitting to power laws as  $G' \sim \omega^\alpha$  and  $G'' \sim \omega^\beta$  in the high-frequency regimes starting from where  $G''$  exceeds  $G'$  as displayed in SI Fig S4(A).
