# Supplementary figures and images for: Scale-dependent interactions enable emergent microrheological stress response of actin–vimentin composites
Source: Royal Society of Chemistry journal article supplement (doi:10.1039/d4sm00988f), 2024-01-01

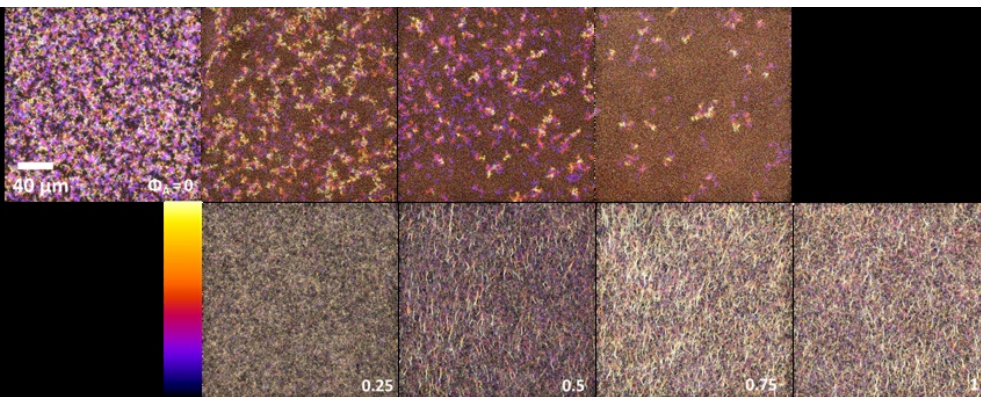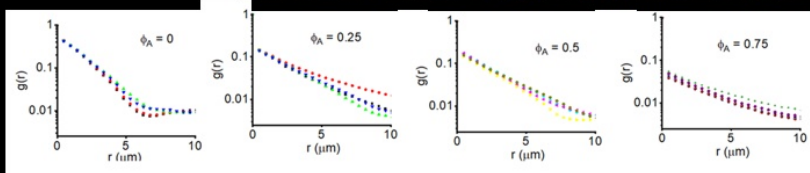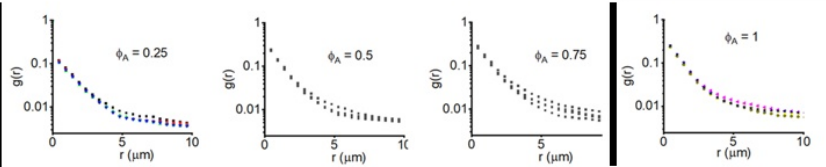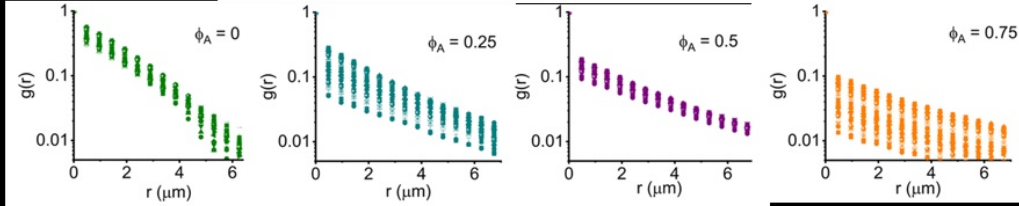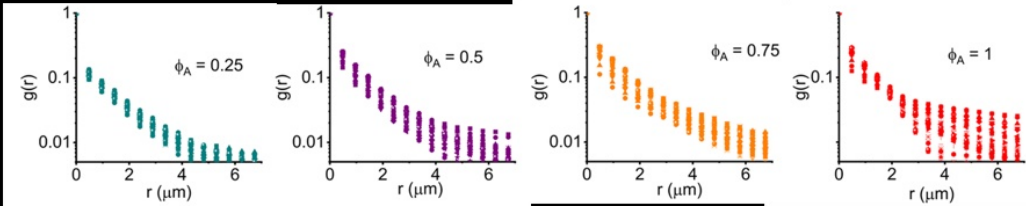

Supplement: d4sm00988f2.pdf [file d4sm00988f2.pdf]

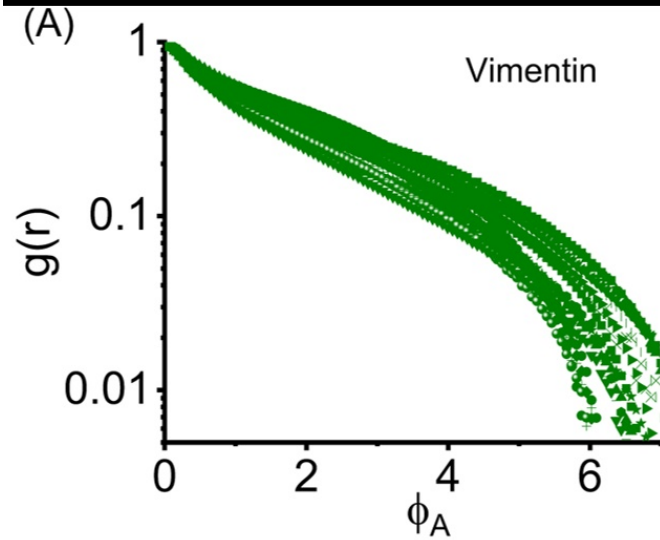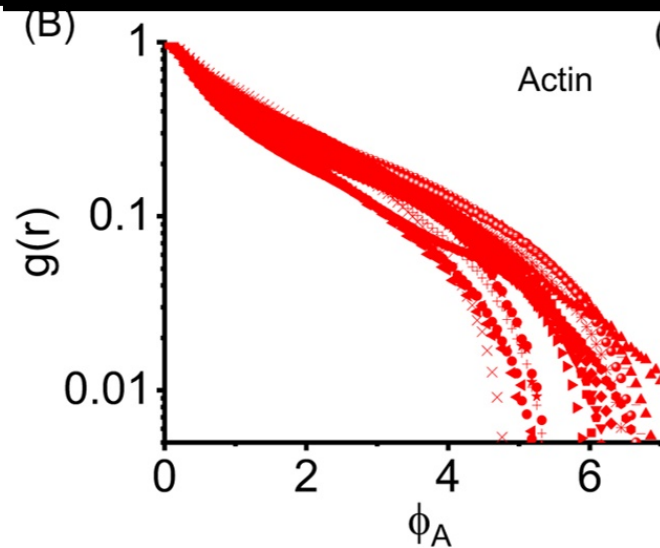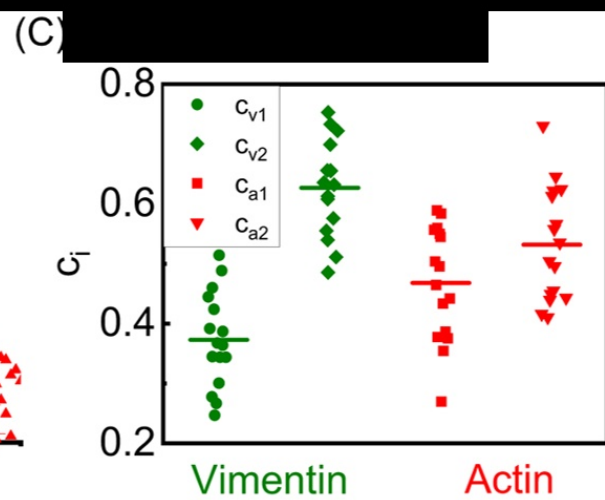

Supplement: d4sm00988f3.pdf [file d4sm00988f3.pdf]

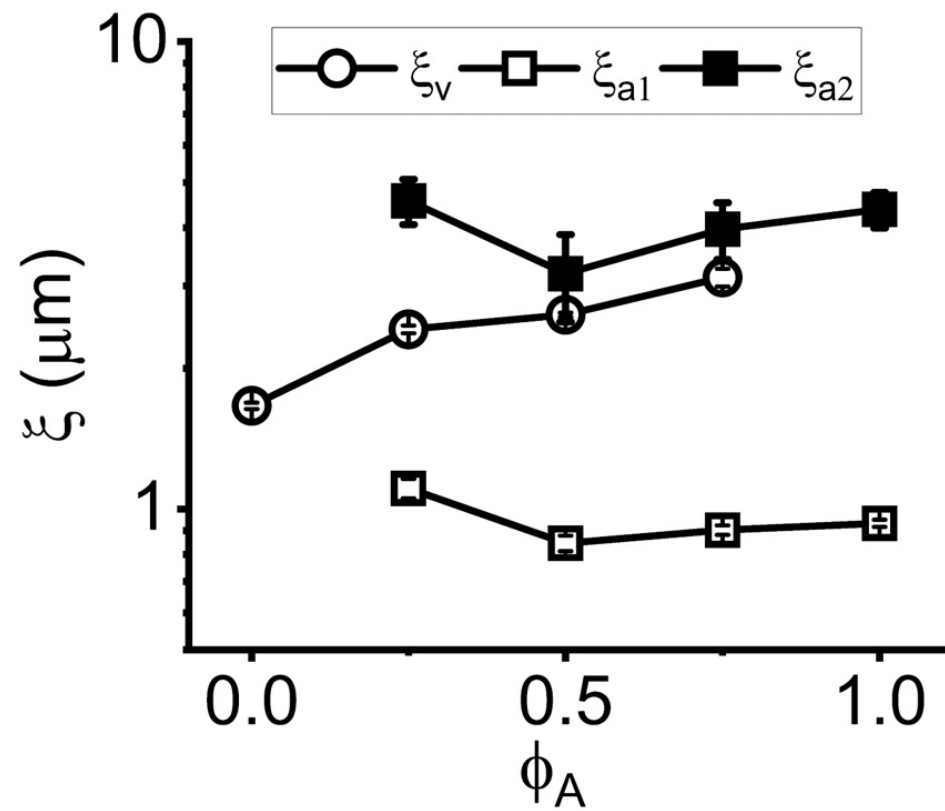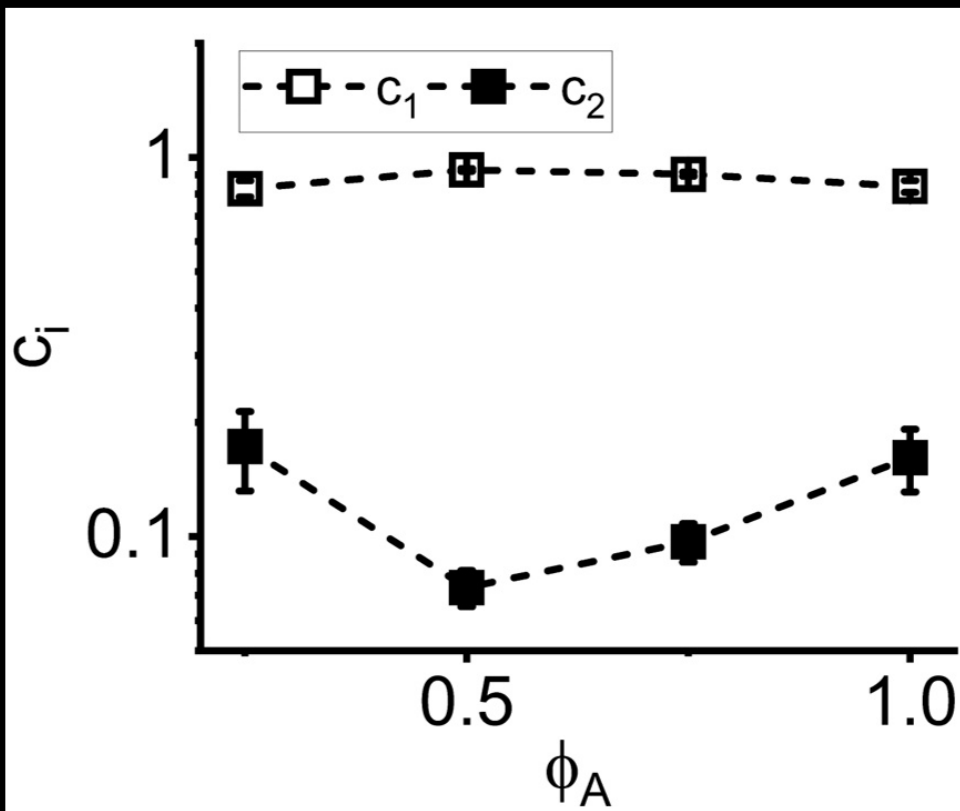

Supplement: d4sm00988f4.pdf [file d4sm00988f4.pdf]

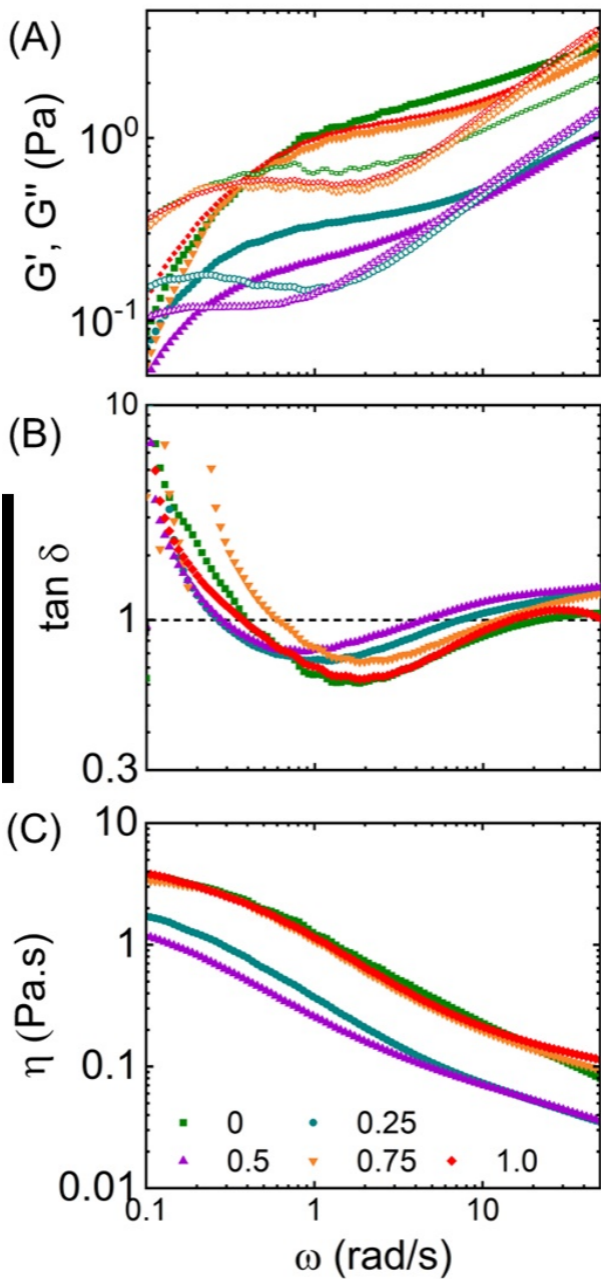

Supplement: d4sm00988f5.pdf [file d4sm00988f5.pdf]

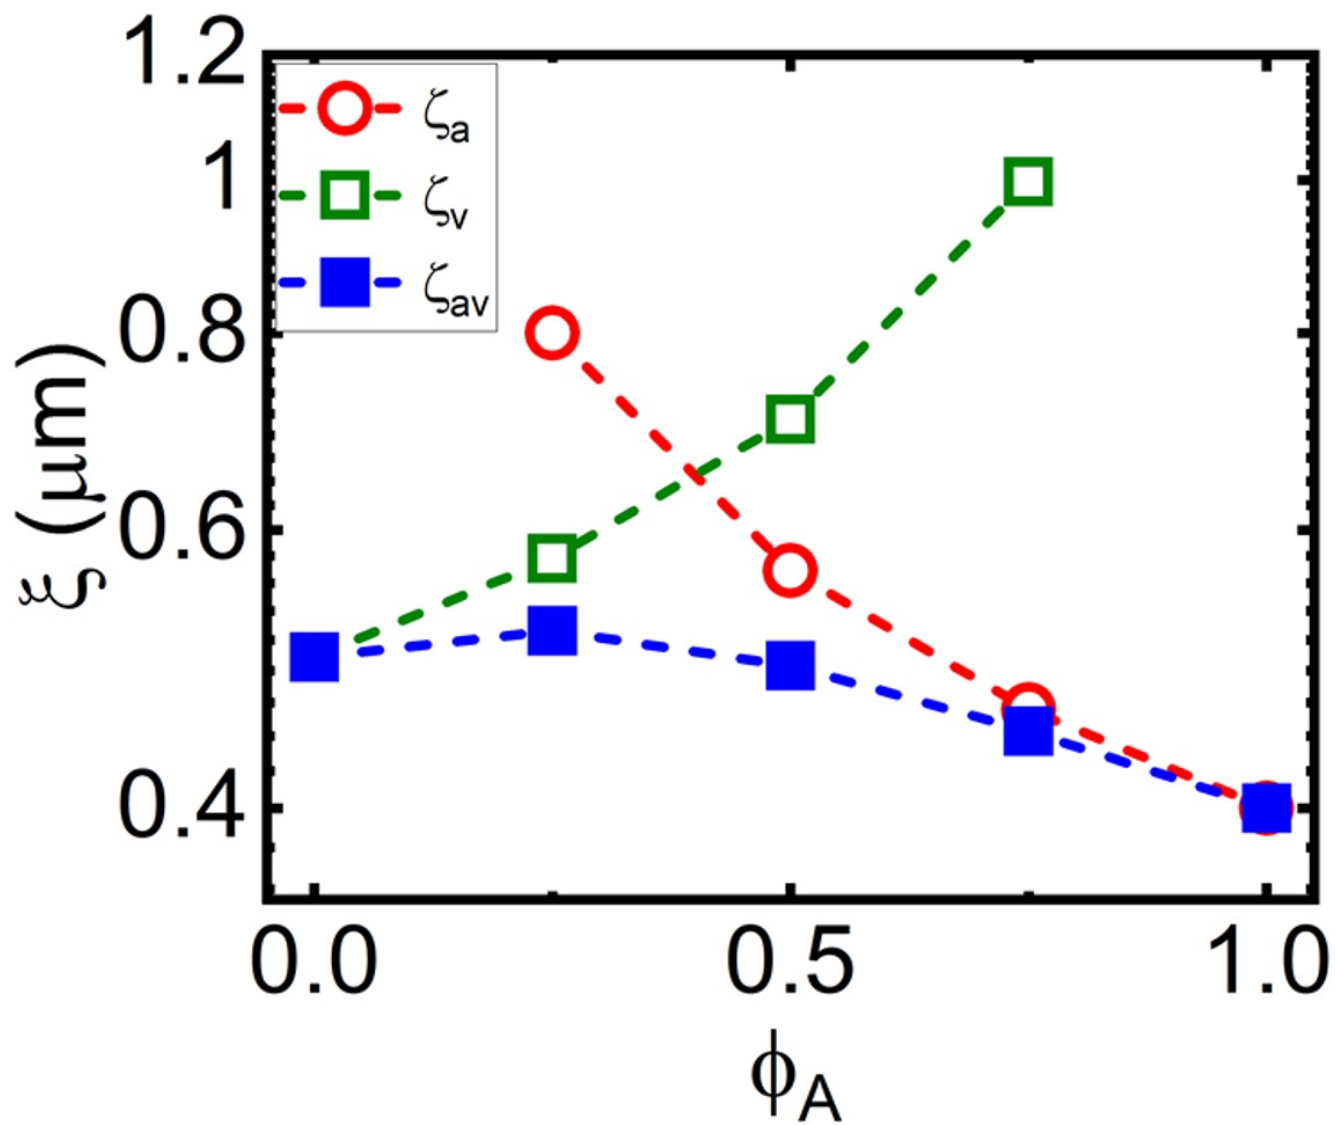

Supplement: d4sm00988f6.pdf [file d4sm00988f6.pdf]

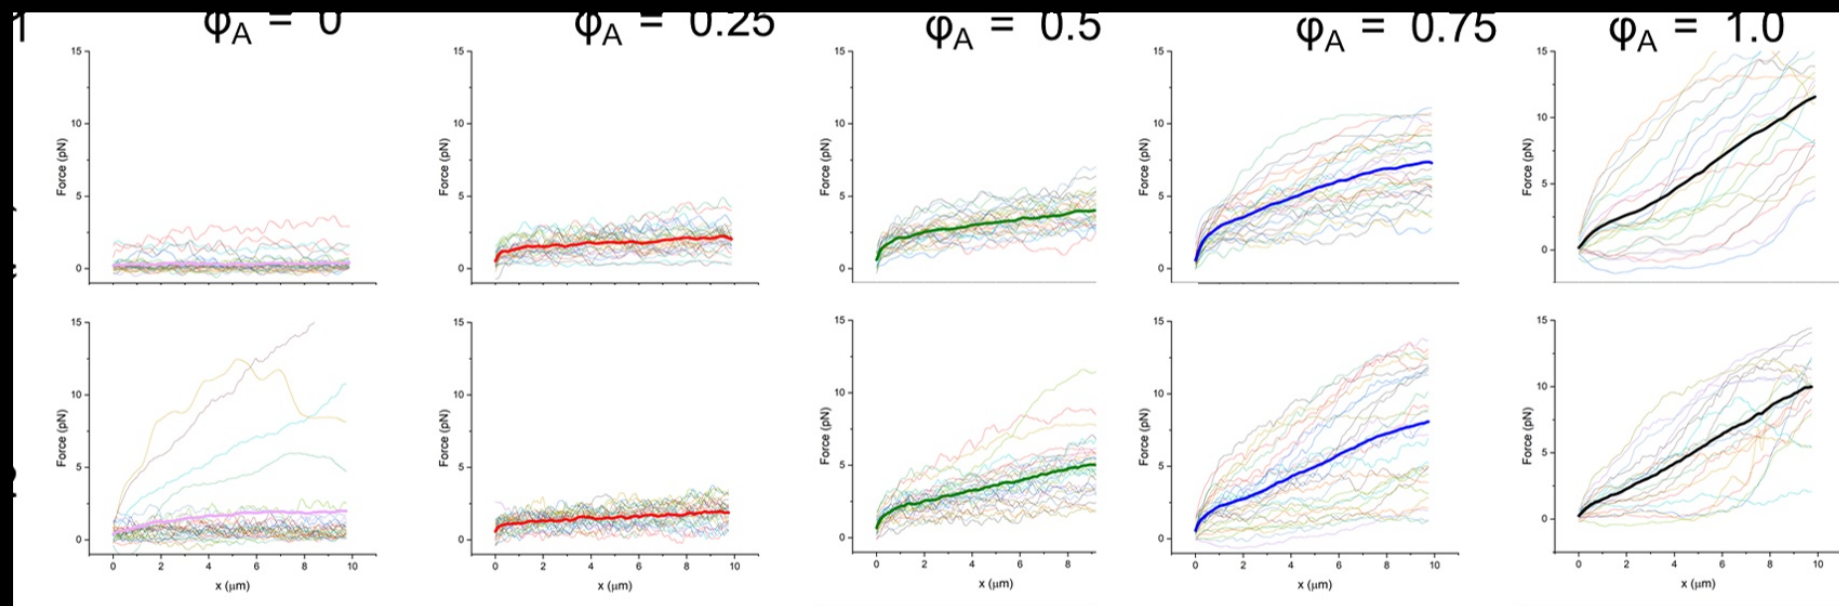

Supplement: d4sm00988f7.pdf [file d4sm00988f7.pdf]

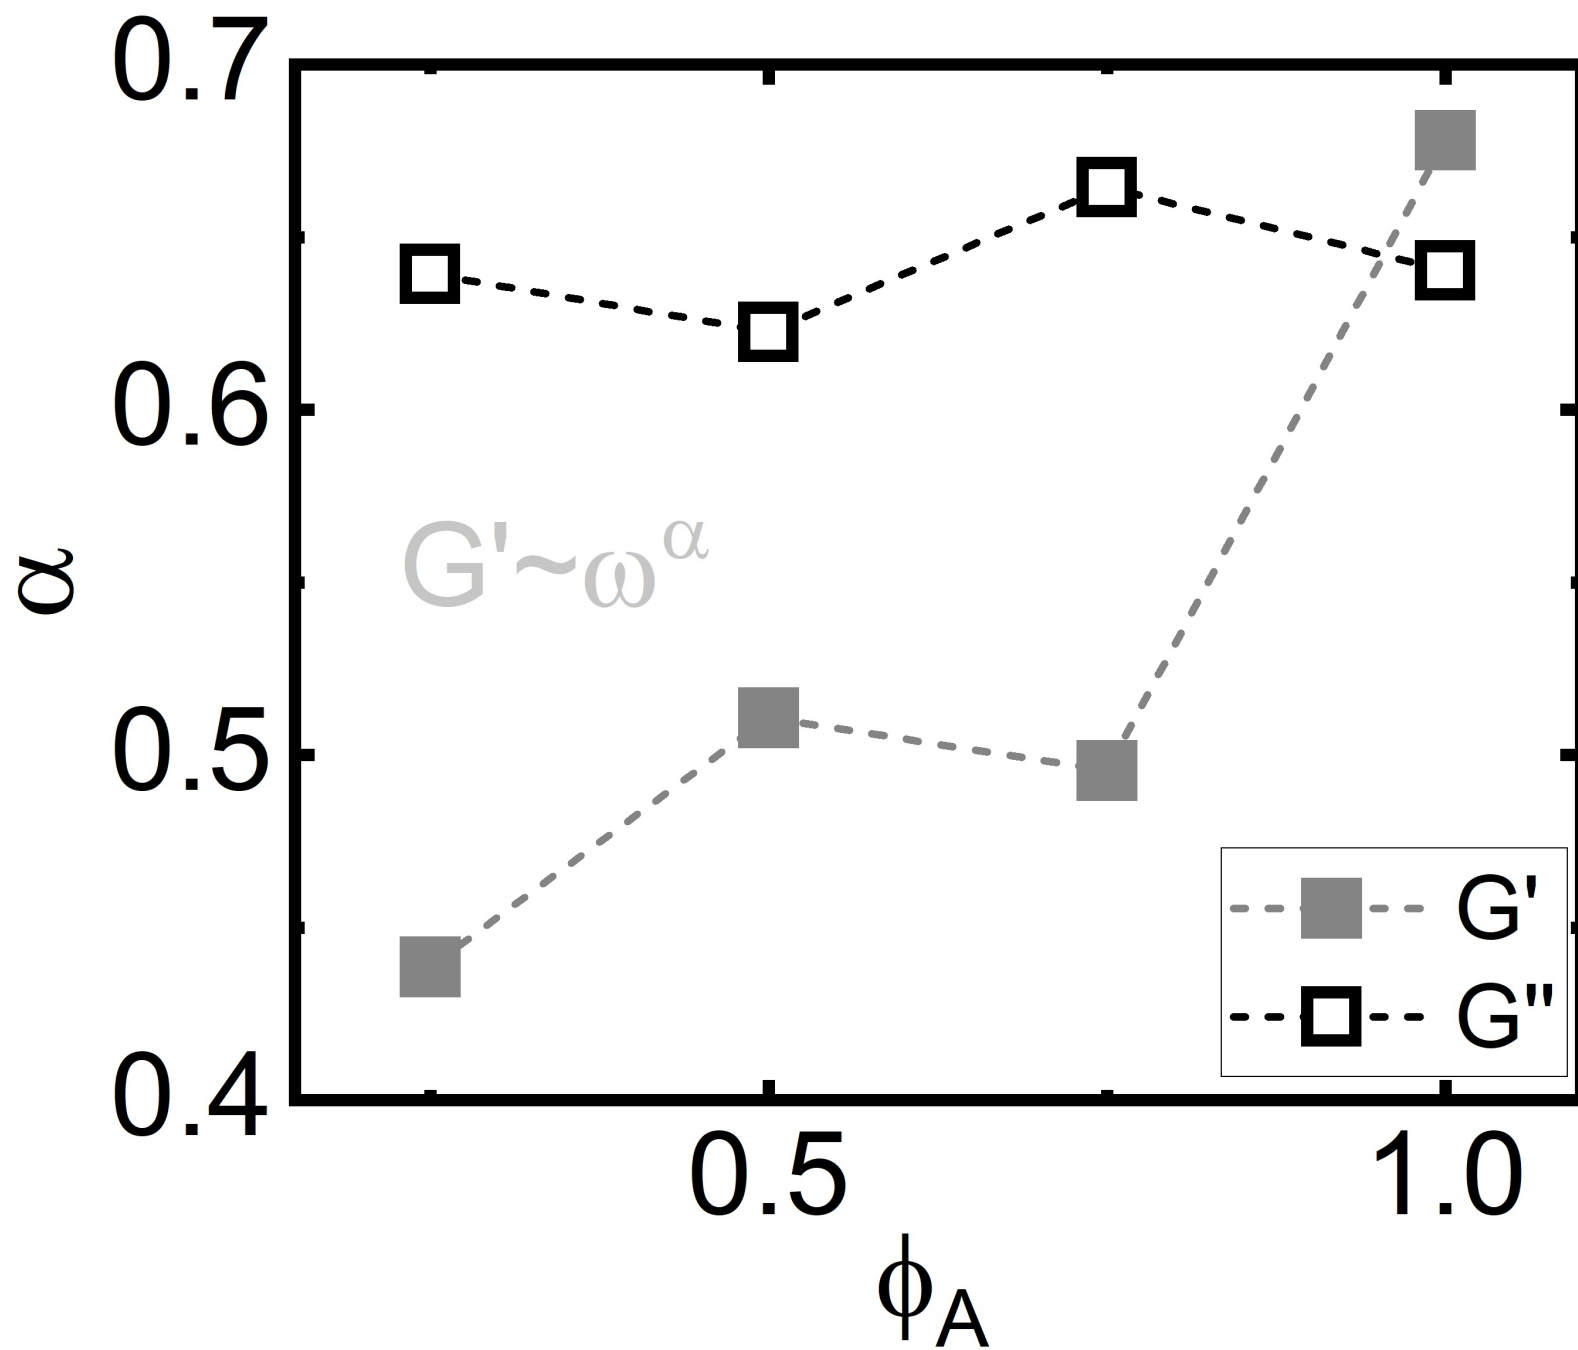

Supplement: d4sm00988f8.pdf [file d4sm00988f8.pdf]
